# Supplementary material for: Integrative effects of morphology, silicification, and light on diatom vertical movements
Source: Front Plant Sci. 2023 Mar 27;14:1143998. doi: 10.3389/fpls.2023.1143998 (PMC10087530; doi:10.3389/fpls.2023.1143998)
Supplement: Supplementary file 2 [file Table_1.xlsx]

## Sheet: Table 1_ One-way ANOVA
			Table 1: Average ± SD of specific growth rate (μmax) in the four diatoms acclimated to different light intensities (n ≥ 3). Letters indicate significant difference among conditions in the same species (p > 0.05)
		Sum of squares	Degree of freedom	Mean Square	Critical F (Fisher)	F (DFn, DFd)	P value
C. muelleri	Treatment	0.2114	2	0.1057	F (2, 6) = 5.14	52.4	0.0002
	Residual	0.0121	6	0.002017
	Total	0.2235	8
		Tukey's multiple comparisons test	Mean Diff.	95.00% CI of diff.	Summary
		15 vs. 60	-0.3141	-0.4267 to -0.2016	***
		15 vs. 180	-0.335	-0.4475 to -0.2225	***
		60 vs. 180	-0.02089	-0.1334 to 0.09162	ns
C. weissflogii	Treatment	0.3243	2	0.1622	F (2, 6) = 5.14	113.5	P<0.0001
	Residual	0.008571	6	0.001429
	Total	0.3329	8
		Tukey's multiple comparisons test	Mean Diff.	95.00% CI of diff.	Summary
		15 vs. 60	-0.4007	-0.4954 to -0.3060	****
		15 vs. 180	-0.4047	-0.4993 to -0.3100	****
		60 vs. 180	-0.003971	-0.09866 to 0.09072	ns
P. tricornutum	Treatment	0.007322	2	0.003661	F (2, 6) = 5.14	274.8	P<0.0001
	Residual	7.993e-05	6	1.332e-05
	Total	0.007402	8
		Tukey's multiple comparisons test	Mean Diff.	95.00% CI of diff.	Summary
		15 vs. 60	-0.05885	-0.06799 to -0.04971	****
		15 vs. 180	-0.06204	-0.07118 to -0.05290	****
		60 vs. 180	-0.003192	-0.01234 to 0.005952	ns
C. fusiformis	Treatment	0.001085	2	0.0005427	F (2, 6) = 5.14	1.296	0.3405
	Residual	0.002512	6	0.0004187
	Total	0.003598	8
		Tukey's multiple comparisons test	Mean Diff.	95.00% CI of diff.	Summary
		15 vs. 60	0.01836	-0.03291 to 0.06962	ns
		15 vs. 180	0.02621	-0.02506 to 0.07747	ns
		60 vs. 180	0.007852	-0.04341 to 0.05911	ns

## Sheet: Figure 3,4,8 and Table 2_t test
					Figure 3: Si content per volume unit (fg·µm-3) in the four diatoms acclimated to different light intensities. Data are means of at least 3 biological replicas. Error bars show SD. Letters represent significant differences among conditions in the same species (p<0.05)
									P value	Summary
								C. muelleri	0.0024	**
								C. weissflogii	0.5529	ns
								P. tricornutum	0.1032	ns
								C. fusiformis	0.9181	ns
					Table 2: Elemental composition (% of C and N on dry weight, and C/N) of the four diatoms acclimated to different light intensities. Data are means of 3 biological replicas ± SD. Asterisks represent significant differences between conditions in the same species (p<0.05).
						%C				%N				C/N
						P value	Summary			P value	Summary			P value	Summary
					C. muelleri	0.5337	ns		C. muelleri	0.133	ns		C. muelleri	0.1202	ns
					C. weissflogii	0.1951	ns		C. weissflogii	0.2857	ns		C. weissflogii	0.0233	*
					P. tricornutum	0.5983	ns		P. tricornutum	0.5596	ns		P. tricornutum	0.141	ns
					C. fusiformis	0.691	ns		C. fusiformis	0.3857	ns		C. fusiformis	0.1123	ns
					Figure 4: δ13C and δ15N values in the four diatoms acclimated to different light intensities. Data are means of 3 biological replicas. Error bars show SD. Asterisks represent significant differences between conditions in the same species (* p<0.05, *** p<0.0001, **** p<0.00001)
							δ13C				δ15N
							P value	Summary			P value	Summary
						C. muelleri	< 0.0001	****		C. muelleri	0.0002	***
						C. weissflogii	0.0337	*		C. weissflogii	0.0101	*
						P. tricornutum	0.1023	ns		P. tricornutum	0.0291	*
						C. fusiformis	0.6284	ns		C. fusiformis	0.0249	*
					Figure 8: (A) τ values representing sedimentation rate (min) in the four diatoms acclimated to different light intensities. Data are means of at least 3 biological replicas. Error bars show SD. Asterisks represent significant differences between conditions in the same species (* p<0.05, ** p<0.001, **** p<0.00001).
									P value	Summary
								C. muelleri	0.0007	***
								C. weissflogii	0.0028	**
								P. tricornutum	0.0483	*
								C. fusiformis	0.0128	*

## Sheet: Figure 5 and 7_PCA analysis
				Figure 5: PCA analysis on morphological characteristics of centric diatoms (C. muelleri and C. weissflogii). Different symbols indicate different growth lights: □ 60 µmol photons·m-2·s-1 ● 180 µmol photons·m-2·s-1.
							Eigenvalues					Loading values
				C. muelleri		PC	Eigenvalue	% variance			PC 1	PC 2	PC 3	PC 4	PC 5
						1	4.66008	66.573		Area	0.35669	0.44738	0.32123	-0.090304	-0.39577
						2	1.77692	25.385		Height	-0.29607	0.56593	0.16401	0.31546	0.6668
						3	0.485698	6.9385		Circularity	0.38914	-0.37973	0.22923	-0.38984	0.56894
						4	0.0725817	1.0369		Width	0.45437	-0.13819	-0.04455	0.19518	0.23788
						5	0.00472755	0.067536		Compactness	-0.30439	-0.3544	0.83935	0.19716	-0.12133
										Diameter	0.36463	0.42532	0.33297	-0.26608	-0.0010166
										Perimeter	0.44903	-0.098919	-0.002024	0.7698	-0.061142
							Eigenvalues					Loading values
				C. weissflogii		PC	Eigenvalue	% variance			PC 1	PC 2	PC 3	PC 4	PC 5
						1	4.02109	65.045		Area	0.39375	0.5128	-0.10633	0.029761	-0.73926
						2	1.48011	23.942		Height	0.44038	-0.031065	0.29383	0.038998	0.20174
						3	0.555209	8.981		Circularity	-0.28656	0.55431	-0.16853	0.29771	0.13997
						4	0.125208	2.0254		Width	0.42507	-0.14554	0.18372	0.78583	0.10167
						5	0.000403562	0.006528		Compactness	-0.26039	0.34382	0.88055	-0.06079	-0.014093
										Diameter	0.37657	0.5114	-0.17096	-0.24199	0.61292
										Perimeter	0.42262	-0.16701	0.1887	-0.47872	-0.083629
				Figure 7: : PCA analysis on morphological characteristics of pennate diatoms (P. tricornutum and C. fusiformis). Different symbols indicate different growing light: ∆ 60 µmol photons·m-2·s-1 ▲ 180 µmol photons·m-2·s-1.
							Eigenvalues					Loading values
				P. tricornutum		PC	Eigenvalue	% variance			PC 1	PC 2	PC 3	PC 4	PC 5
						1	4.53065	64.724		Area	-0.41735	0.29739	-0.066589	0.58164	0.32892
						2	2.14928	30.704		Height	0.2306	0.58959	0.21443	-0.059275	0.0079078
						3	0.255877	3.6554		Elongatedeness	-0.42701	-0.041992	0.81393	0.10062	0.069601
						4	0.055048	0.7864		Width	-0.34504	0.43231	-0.47819	0.087304	-0.0050869
						5	0.00915241	0.13075		Compactness	0.46801	-0.01487	0.037595	0.098524	0.82793
										Length	0.19772	0.61232	0.21842	-0.29156	-0.13087
										Perimeter	0.46166	0.011445	0.096481	0.73873	-0.42929
							Eigenvalues					Loading values
				C. fusiformis		PC	Eigenvalue	% variance			PC 1	PC 2	PC 3	PC 4	PC 5
						1	5.22533	74.648		Area	0.32056	0.6053	0.060934	-0.40339	-0.52077
						2	1.22663	17.523		Height	0.33421	0.4394	-0.58116	0.55513	0.10676
						3	0.483563	6.908		Elongatedeness	-0.42502	0.14958	0.15803	0.56017	-0.12912
						4	0.0521034	0.74433		Width	0.43458	-0.07885	0.012082	-0.1166	0.61828
						5	0.0123756	0.17679		Compactness	-0.28432	0.63247	0.4148	-0.084922	0.51884
										Length	0.38929	-0.072628	0.62927	0.43066	-0.20599
										Perimeter	0.42855	-0.081545	0.25571	0.095068	0.082597
